# Supplementary material for: Epigenetic Effects of Gender-Affirming Hormone Treatment: A Pilot Study of the ESR2 Promoter’s Methylation in AFAB People
Source: MDPI journal article supplement (doi:10.3390/biomedicines10020459), 2022-02-16
Supplement: s1 [file s1]

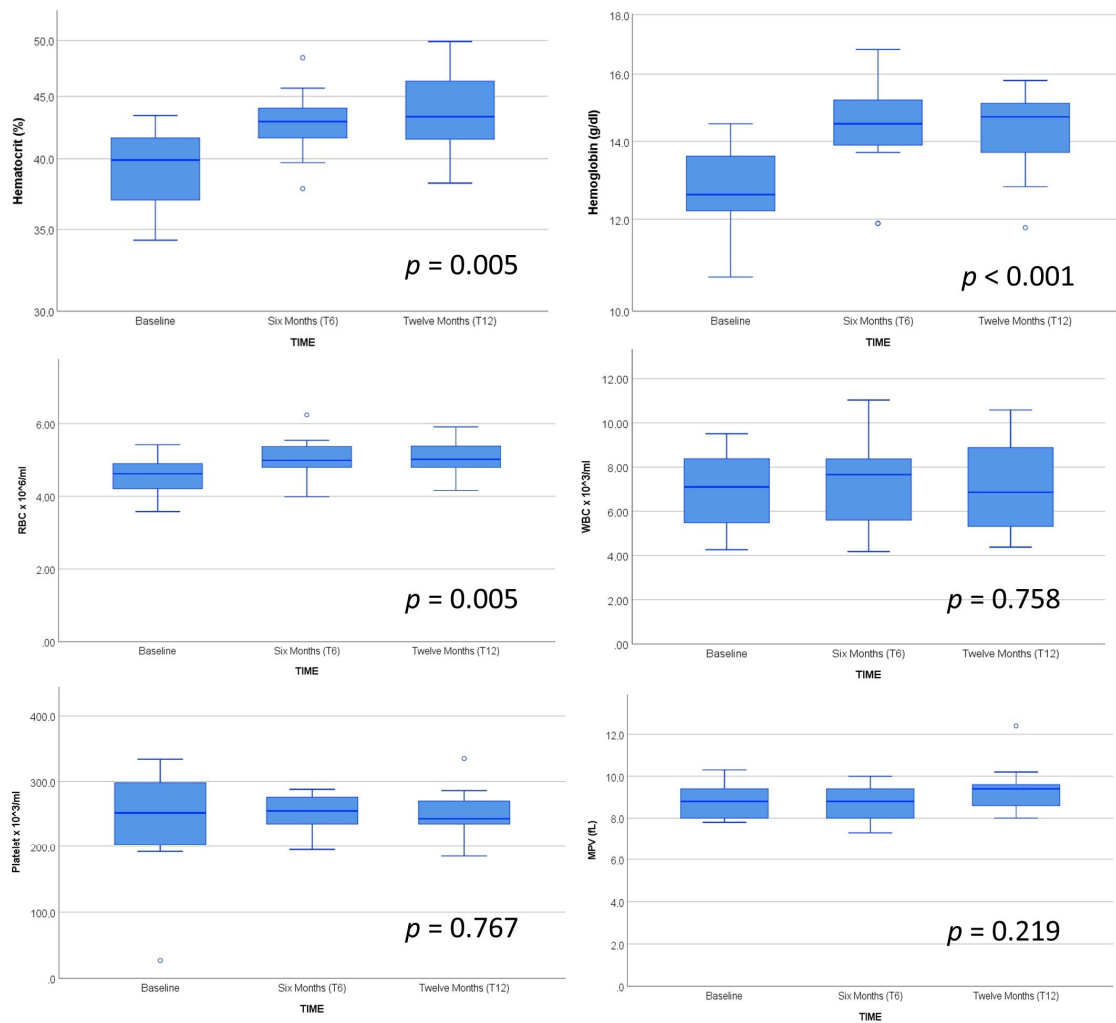

**Figure S1.** Boxplots of the hemocytometric parameters before and during testosterone treatment.

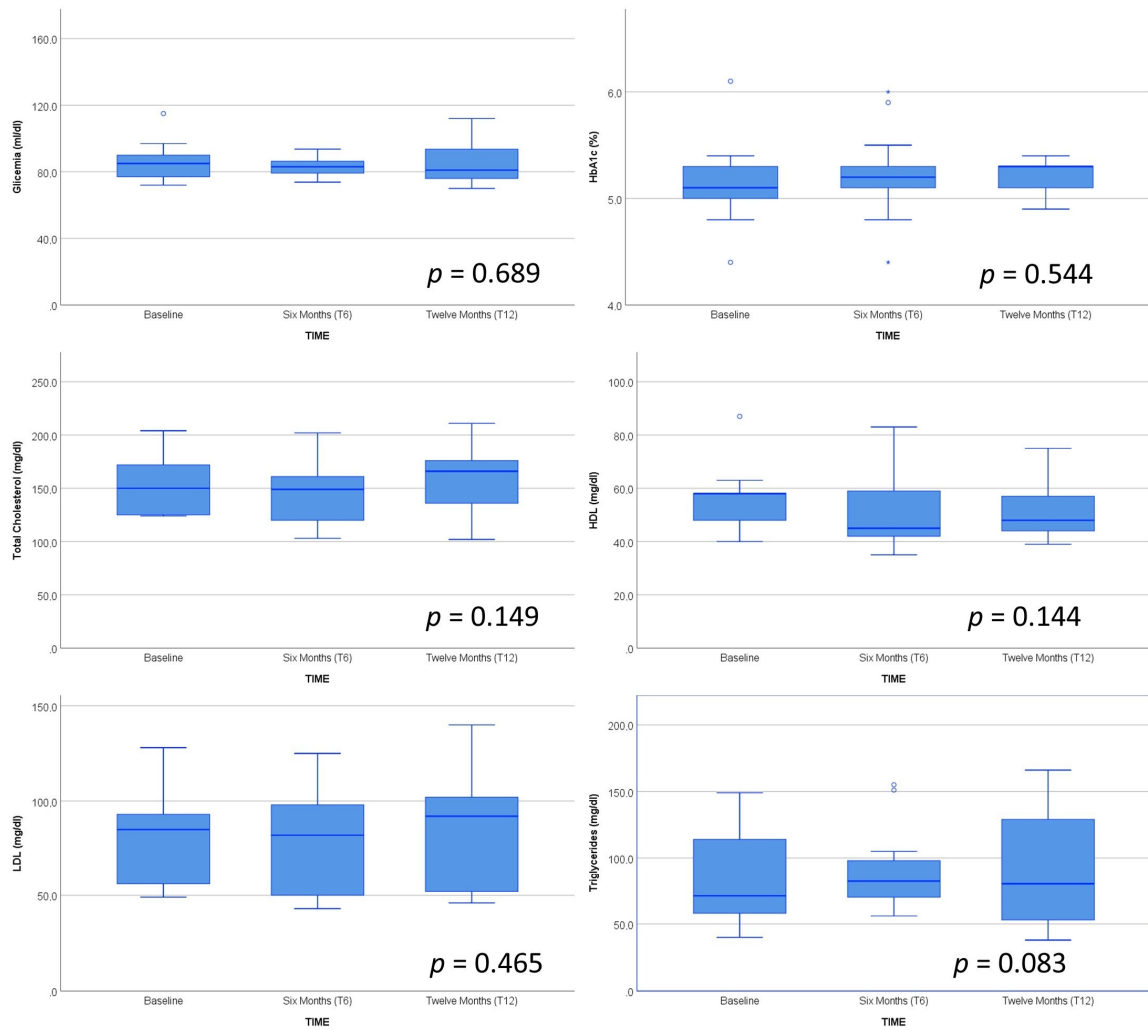

**Figure S2.** Boxplots of the glycolipid parameters before and during testosterone treatment.

**Table S1.** Primers used and amplification protocol for fragment analysis of AR and ER $\beta$  polymorphisms.

| Gene       | Position | Polymorphism               | Primers                                                                | Conditions of amplification                             |
|------------|----------|----------------------------|------------------------------------------------------------------------|---------------------------------------------------------|
| ER $\beta$ | 14q22-24 | (CA) <sub>n</sub> intron 5 | 6-FAM-5'-GGTAAACCATGGTCTGTACC-3'<br>5'-AACAAAATGTTGAATGAGTGGG-3'       | 35 cycles:                                              |
|            |          |                            |                                                                        | 95°C 30 sec<br>61°C 30 sec<br>72°C 30 sec<br>72°C 7 min |
| AR         | Xq11-12  | (CAG) <sub>n</sub> exon 1  | 6-FAM-5'-TCCAGAATCTGTTCCAGAGCGTGC-3'<br>5'-GCTGTGAAGGTTGCTGTTCTCAT-3'' | 35 cycles:                                              |
|            |          |                            |                                                                        | 94°C 45 sec<br>59°C 30 sec<br>72°C 1 min<br>72°C 7 min  |
